# Supplementary material for: A homochiral tartrate-bridged dinuclear chromium(iii) complex anion with a resonance-assisted hydrogen bond for proton conduction
Source: Royal Society of Chemistry journal article supplement (doi:10.1039/d4dt00783b), 2024-01-01
Supplement: d4dt00783b1.pdf [file d4dt00783b1.pdf]

## Electronic supplementary information

for

# Homochiral tartrate-bridged dinuclear chromium(III) complex anion with resonance-assisted hydrogen bond for proton conduction

Marko Dunatov,<sup>a</sup> Zhibo Zhao,<sup>b</sup> Dijana Žilić<sup>a</sup> and Lidija Androš Dubraja<sup>\*a</sup>

<sup>1</sup> Ruđer Bošković Institute, Bijenička cesta 54, 10000 Zagreb, Croatia

<sup>2</sup> Institute of Nanotechnology, Karlsruhe Institute of Technology, Kaiserstraße 12, 76131 Karlsruhe, Germany

*E-mail: lidija.andros@irb.hr; Tel: +385 1 4561184*

## Contents

|                                                                                                                                                                                       |   |
|---------------------------------------------------------------------------------------------------------------------------------------------------------------------------------------|---|
| <b>Figure S1.</b> Energy dispersive X-ray spectrum for crystals of compound <b>1</b> . .....                                                                                          | 3 |
| <b>Figure S2.</b> PXRD pattern and profile fitting results for Na[Cr <sub>2</sub> (bpy) <sub>2</sub> (L-tart) <sub>2</sub> H]·9H <sub>2</sub> O ( <b>1</b> ) .....                    | 3 |
| <b>Table S1.</b> Crystallographic data and structure refinement details for compound <b>1</b> .....                                                                                   | 4 |
| <b>Table S2.</b> Geometric parameters of the aromatic stacking interactions in Na[Cr <sub>2</sub> (bpy) <sub>2</sub> (L-tart) <sub>2</sub> H]·9H <sub>2</sub> O ( <b>1</b> )<br>..... | 5 |
| <b>Table S3.</b> Possible hydrogen–bonding geometry in Na[Cr <sub>2</sub> (bpy) <sub>2</sub> (L-tart) <sub>2</sub> H]·9H <sub>2</sub> O ( <b>1</b> ) .....                            | 6 |
| <b>Figure S3.</b> TGA and DSC curves for Na[Cr <sub>2</sub> (bpy) <sub>2</sub> (L-tart) <sub>2</sub> H]·9H <sub>2</sub> O ( <b>1</b> ).....                                           | 7 |
| <b>Table S4.</b> Thermoanalytical data for Na[Cr <sub>2</sub> (bpy) <sub>2</sub> (L-tart) <sub>2</sub> H]·9H <sub>2</sub> O ( <b>1</b> ).....                                         | 7 |

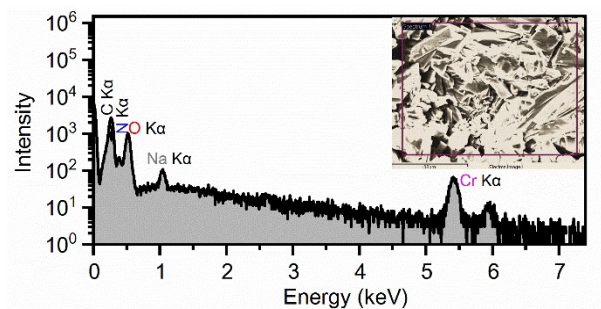

**Figure S1.** Energy dispersive X-ray spectrum for crystals of compound **1**.

EDX was performed on a field emission scanning electron microscope (model JSM-7000F) operated at 10 keV.

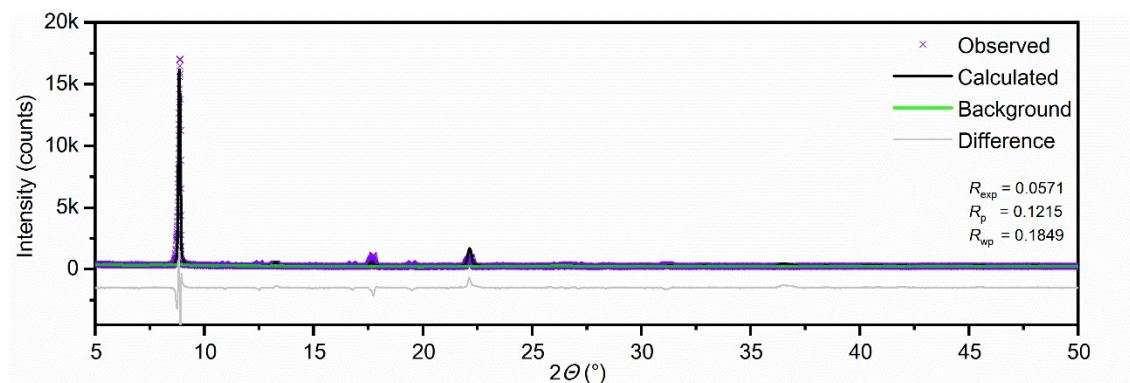

**Figure S2.** PXRD pattern and profile fitting results for Na[Cr<sub>2</sub>(bpy)<sub>2</sub>(L-tart)<sub>2</sub>H]·9H<sub>2</sub>O (**1**)

**Table S1.** Crystallographic data and structure refinement details for compound **1**

| Temperature/K                                                         | 100                           |                                                                                                                                                    | 200            |                                                                                                                                                     |
|-----------------------------------------------------------------------|-------------------------------|----------------------------------------------------------------------------------------------------------------------------------------------------|----------------|-----------------------------------------------------------------------------------------------------------------------------------------------------|
| Crystal colour, habit                                                 | red, stick                    |                                                                                                                                                    |                |                                                                                                                                                     |
| Empirical formula                                                     | $C_{28}H_{39}Cr_2N_4NaO_{21}$ |                                                                                                                                                    |                |                                                                                                                                                     |
| $M_r/g\ mol^{-1}$                                                     | 894.62                        |                                                                                                                                                    |                |                                                                                                                                                     |
| Crystal system                                                        | Monoclinic                    |                                                                                                                                                    |                |                                                                                                                                                     |
| Space group                                                           | $P2$                          |                                                                                                                                                    |                |                                                                                                                                                     |
| $a/\text{\AA}$                                                        | 21.0907(6)                    |                                                                                                                                                    | 19.9810(5)     |                                                                                                                                                     |
| $b/\text{\AA}$                                                        | 8.6541(2)                     |                                                                                                                                                    | 8.7003(2)      |                                                                                                                                                     |
| $c/\text{\AA}$                                                        | 22.8011(5)                    |                                                                                                                                                    | 22.9085(5)     |                                                                                                                                                     |
| $\alpha/^\circ$                                                       | 90                            |                                                                                                                                                    | 90             |                                                                                                                                                     |
| $\beta/^\circ$                                                        | 110.661(3)                    |                                                                                                                                                    | 99.220(2)      |                                                                                                                                                     |
| $\gamma/^\circ$                                                       | 90                            |                                                                                                                                                    | 90             |                                                                                                                                                     |
| $V/\text{\AA}^3$                                                      | 3894.02(18)                   |                                                                                                                                                    | 3930.98(16)    |                                                                                                                                                     |
| $Z$                                                                   | 2                             |                                                                                                                                                    | 2              |                                                                                                                                                     |
| $\rho_{\text{calcd}}/g\ cm^{-3}$                                      | 1.526                         |                                                                                                                                                    | 1.512          |                                                                                                                                                     |
| $\mu/mm^{-1}$                                                         | 5.481                         |                                                                                                                                                    | 5.430          |                                                                                                                                                     |
| $F(000)$                                                              | 1848                          |                                                                                                                                                    | 1848           |                                                                                                                                                     |
| $\theta$ range/ $^\circ$                                              | 3.54–79.64                    |                                                                                                                                                    | 3.21–77.82     |                                                                                                                                                     |
| Measured reflections                                                  | 35728                         |                                                                                                                                                    | 29681          |                                                                                                                                                     |
| Independent reflections                                               | 15014                         |                                                                                                                                                    | 11359          |                                                                                                                                                     |
| Observed reflections                                                  | 12819                         |                                                                                                                                                    | 10097          |                                                                                                                                                     |
| No. of parameters, restraints                                         | 1034,<br>5                    | 837,<br>2                                                                                                                                          | 1061,<br>3     | 835,<br>5                                                                                                                                           |
| $R_{\text{int}}$                                                      | 0.0807                        |                                                                                                                                                    | 0.0453         |                                                                                                                                                     |
| $R, wR [I > 2\sigma(I)]$                                              | 0.0967, 0.2704                | 0.0572, 0.1501                                                                                                                                     | 0.0753, 0.2164 | 0.0653, 0.1870                                                                                                                                      |
| $R, wR$ [all data]                                                    | 0.1080, 0.2857                | 0.0671, 0.1441                                                                                                                                     | 0.0840, 0.2244 | 0.0725, 0.1924                                                                                                                                      |
| Goodness of fit                                                       | 1.173                         | 1.076                                                                                                                                              | 1.089          | 1.053                                                                                                                                               |
| Flack parameter                                                       | 0.006(5)                      | 0.011(5)                                                                                                                                           | 0.006(9)       | 0.010(7)                                                                                                                                            |
| $\Delta\rho_{\text{max}}, \Delta\rho_{\text{min}}/e\ \text{\AA}^{-3}$ | 2.494, -1.006                 | 0.544; -0.856                                                                                                                                      | 1.138, -0.718  | 1.518, -0.580                                                                                                                                       |
| PLATON SQUEEZE details                                                | -                             | Volume 1 = 1378 $\text{\AA}^3$<br>Volume 2 = 7 $\text{\AA}^3$<br>Electron count 1 = 492<br>Electron count 2 = 8<br>Probe radius = 1.2 $\text{\AA}$ | -              | Volume 1 = 1398 $\text{\AA}^3$<br>Volume 2 = 14 $\text{\AA}^3$<br>Electron count 1 = 514<br>Electron count 2 = 8<br>Probe radius = 1.2 $\text{\AA}$ |

**Table S2.** Geometric parameters of the aromatic stacking interactions in Na[Cr<sub>2</sub>(bpy)<sub>2</sub>(L-tart)<sub>2</sub>H]·9H<sub>2</sub>O (**1**)

| Cg(i)⋯Cg(j)       | Cg(i)⋯Cg(j)/Å <sup>a</sup> | α/° <sup>b</sup> | β/° <sup>c</sup> | Cg(i)⋯plane [Cg(j)]/Å <sup>d</sup> | Symmetry operator        |
|-------------------|----------------------------|------------------|------------------|------------------------------------|--------------------------|
| (N1→C5)⋯(N5→C25)  | 4.029(7)                   | 6.0(5)           | 28.4             | 3.437(4)                           | <i>x, y, z</i>           |
| (N2→C10)⋯(N6→C30) | 3.575(6)                   | 1.5(5)           | 21.2             | 3.346(4)                           | <i>x, -1 + y, z</i>      |
| (N3→C15)⋯(N8→C40) | 3.603(8)                   | 4.7(7)           | 20.4             | 3.445(6)                           | <i>x, y, -1 + z</i>      |
| (N3→C15)⋯(N7→C35) | 4.215(9)                   | 7.1(8)           | 36.4             | 3.335(5)                           | <i>x, -1 + y, -1 + z</i> |
| (N4→C20)⋯(N8→C40) | 3.760(8)                   | 6.4(7)           | 23.7             | 3.468(5)                           | <i>x, -1 + y, -1 + z</i> |

<sup>a</sup> Cg = centre of gravity of the aromatic ring. <sup>b</sup> α = angle between the planes of two aromatic rings. <sup>c</sup> β = angle between the Cg⋯Cg line and the normal to the plane of the first aromatic ring.

**Table S3.** Possible hydrogen–bonding geometry in Na[Cr<sub>2</sub>(bpy)<sub>2</sub>(L-tart)<sub>2</sub>H]·9H<sub>2</sub>O (**1**)

| <i>D</i> ... <i>A</i> | <i>D</i> ... <i>A</i> /Å | <i>D</i> ... <i>A</i> | <i>D</i> ... <i>A</i> /Å |
|-----------------------|--------------------------|-----------------------|--------------------------|
| O25...O26             | 2.79(2)                  | O36 ...O28            | 3.07(3)                  |
| O25...O13             | 2.934(14)                | O37 ...O42            | 2.88(3)                  |
| O26...O20             | 2.728(19)                | O37...O39             | 2.94(3)                  |
| O26...O24             | 2.834(19)                | O38...O14             | 2.822(13)                |
| O27...O28             | 2.855(19)                | O39...O36             | 2.73(4)                  |
| O27...O14             | 2.941(16)                | O39...O11             | 2.88(2)                  |
| O28 ...O45            | 2.80(4)                  | O40...O48             | 2.45(8)                  |
| O28 ...O1             | 2.996(16)                | O40...O26             | 3.23(8)                  |
| O29...O22             | 2.63(2)                  | O41...O47             | 2.24(4)                  |
| O29...O44             | 2.67(4)                  | O41...O3              | 2.649(16)                |
| O30...O2              | 2.729(15)                | O42 ...O12            | 2.80(2)                  |
| O30...O18             | 2.807(18)                | O42 ...O30            | 3.45(3)                  |
| O31...O35             | 2.64(3)                  | O43...O48             | 2.36(6)                  |
| O31...O8              | 2.719(19)                | O43...O48             | 3.12(6)                  |
| O32...O46             | 2.59(2)                  | O44...O24             | 2.73(4)                  |
| O32...O8              | 3.085(17)                | O44...O20             | 3.15(3)                  |
| O33 ...O41            | 2.41(3)                  | O45...O39             | 2.98(4)                  |
| O33 ...O5             | 2.746(15)                | O45...O30             | 3.03(4)                  |
| O34...O7              | 2.845(17)                | O46...O46             | 2.09(3)                  |
| O34...O41             | 3.11(3)                  | O46...O10             | 2.639(18)                |
| O35...O43             | 2.91(3)                  | O47 ...O10            | 2.44(3)                  |
| O35...O24             | 3.36(3)                  | O47 ...O3             | 2.59(3)                  |
| O36...O42             | 2.59(5)                  | O48...O24             | 3.04(6)                  |

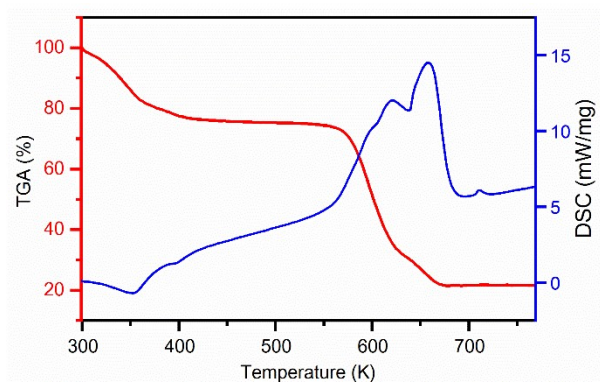

**Figure S3.** TGA and DSC curves for Na[Cr<sub>2</sub>(bpy)<sub>2</sub>(L-tart)<sub>2</sub>H]·9H<sub>2</sub>O (**1**)

TGA/DSC was measured under a synthetic air atmosphere at 10 K min<sup>-1</sup> heating rate using a simultaneous thermal analyser Netzsch STA 449 F5 Jupiter.

**Table S4.** Thermoanalytical data for Na[Cr<sub>2</sub>(bpy)<sub>2</sub>(L-tart)<sub>2</sub>H]·9H<sub>2</sub>O (**1**)

| $\Delta T$ (K) | Mass loss (%)                                                   |              |                                                    | $T(\text{DSC}_{\text{max}})$ (K) |
|----------------|-----------------------------------------------------------------|--------------|----------------------------------------------------|----------------------------------|
|                | <i>exp.</i>                                                     | <i>calc.</i> | <i>elimination</i>                                 |                                  |
| 300–365        | 18.18                                                           | 18.12        | 9H <sub>2</sub> O                                  | 352 endo                         |
| 540–625        | bpy and (L-tart) <sub>2</sub> H<br>elimination is<br>overlapped | 34.92        | 2bpy                                               | 620 egzo                         |
| 625–680        |                                                                 | 25.62        | (L-tart) <sub>2</sub> H                            | 657 egzo                         |
| residue        | 21.58                                                           | 21.34        | Na <sub>2</sub> O + Cr <sub>2</sub> O <sub>3</sub> | 710 egzo                         |
